# Supplementary material for: Scoring haemophilic arthropathy on X-rays: improving inter- and intra-observer reliability and agreement using a consensus atlas
Source: PubMed Central journal article supplement — Eur Radiol. 2015 Sep 24;26:1963–70. doi: 10.1007/s00330-015-4013-8 (PMC4869743; doi:10.1007/s00330-015-4013-8), 2015-09-24

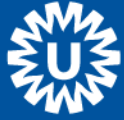

UMC Utrecht

# Consensus atlas

*for scoring haemophilic arthropathy on  
X-rays according to the Pettersson score*

Wouter Foppen • Irene C. van der Schaaf • Frederik J.A. Beek  
Helena M. Verkooijen • Kathelijn Fischer

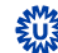

# Contents

*Select joint of interest*

elbow

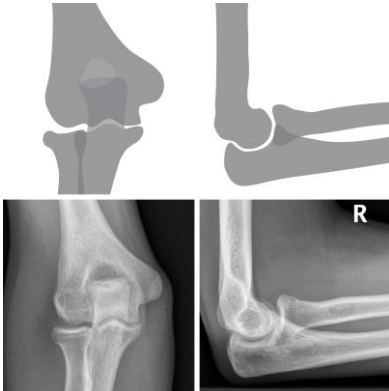

knee

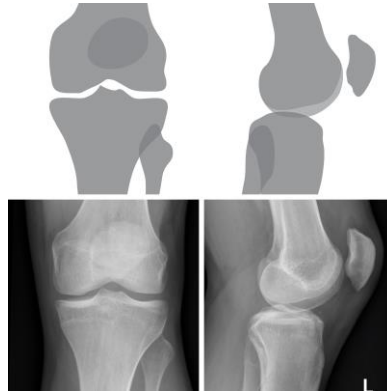

ankle

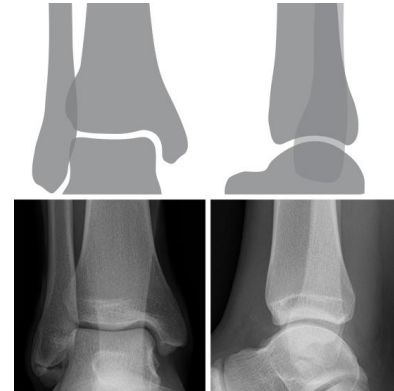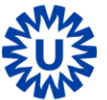

# Elbow

*Select example image of interest*

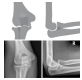

Normal

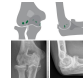

Subchondral cyst formation

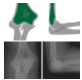

Osteoporosis

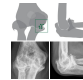

Erosion of joint margins

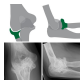

Enlargement of epiphysis

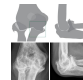

Gross incongruence  
of articulation bone ends

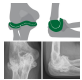

Irregularity of subchondral surface

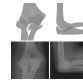

Joint deformity  
(angulation and / or displacement)

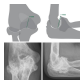

Narrowing of joint space

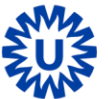

# Elbow

## *Normal*

without abnormalities (score 0)

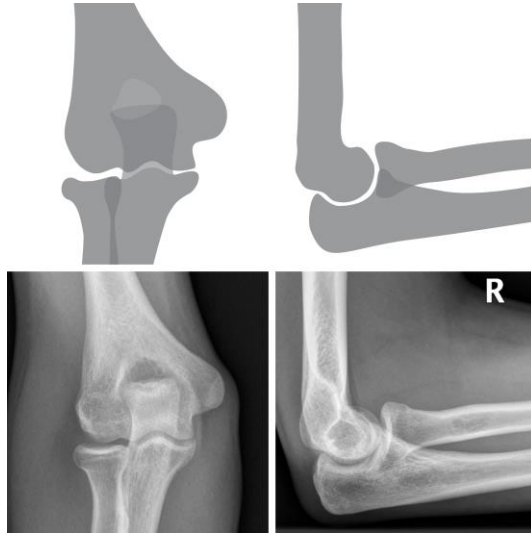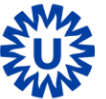

# Elbow

## *Osteoporosis*

present (score 1)

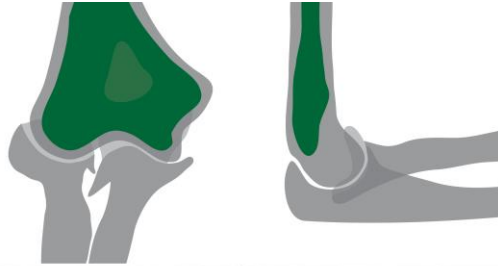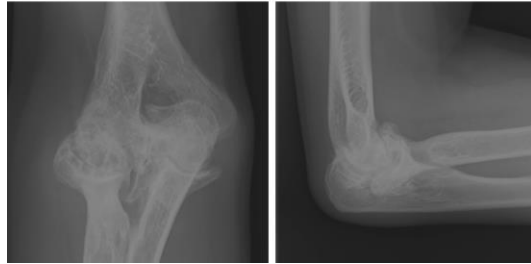

# Elbow

## *Enlargement of epiphysis*

present (score 1)

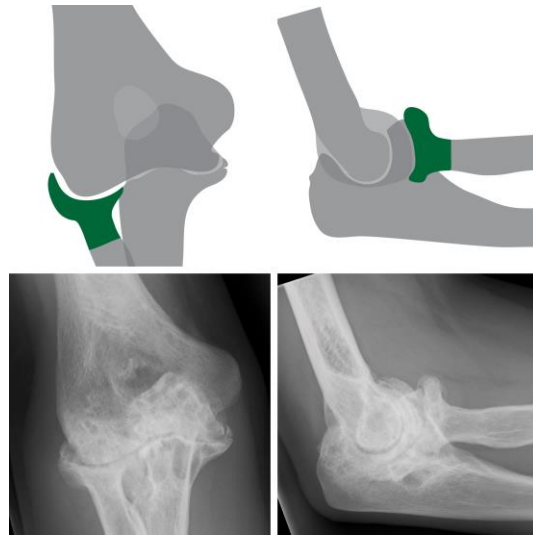

# Elbow

## *Irregularity of subchondral surface*

partially involved (score 1)

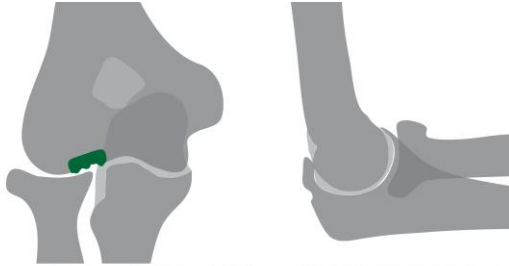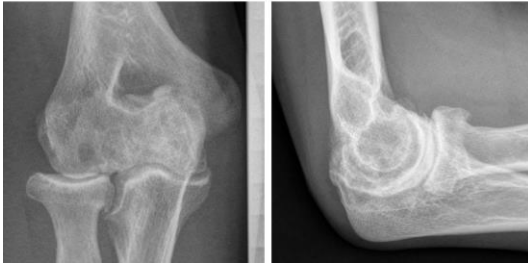

totally involved (score 2)

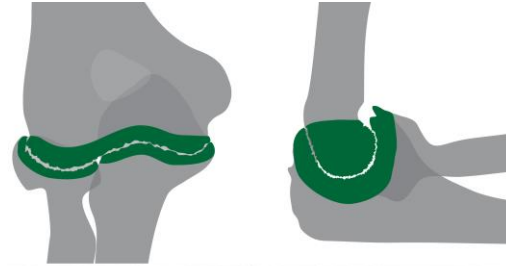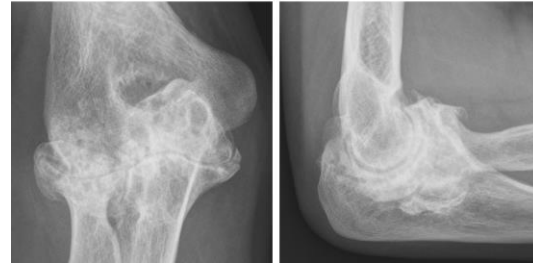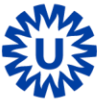

# Elbow

## *Narrowing of joint space*

joint space >1mm (score 1)

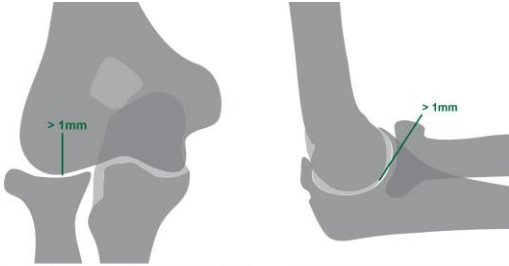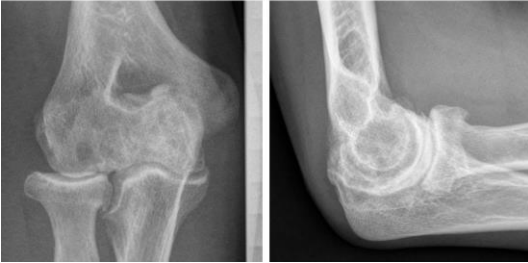

joint space <1mm (score 2)

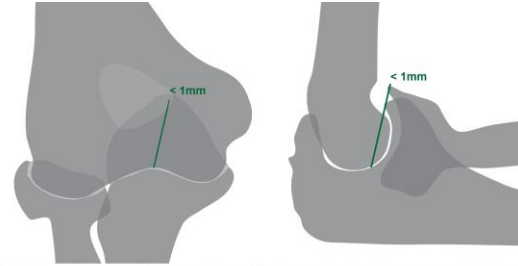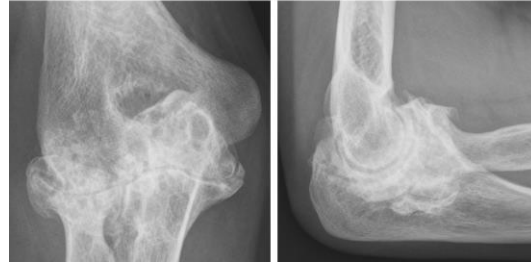



# Elbow

## *Subchondral cysts formation*

1 cyst (score 1)

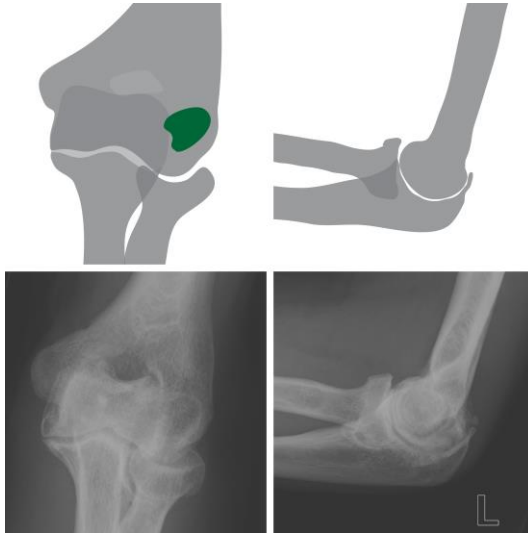

>1 cyst (score 2)

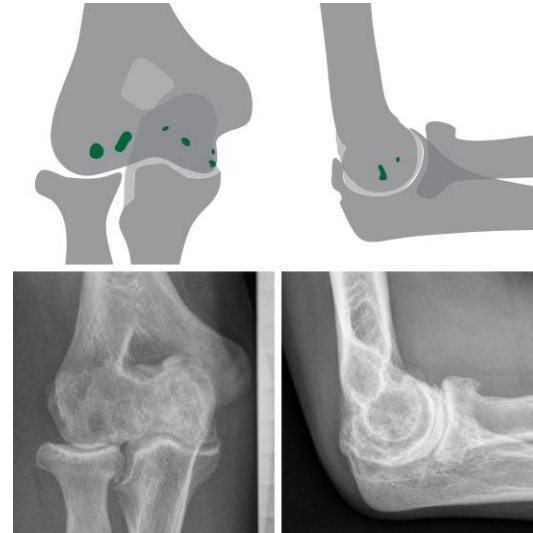

# Elbow

## *Erosion of joint margins*

present (score 1)

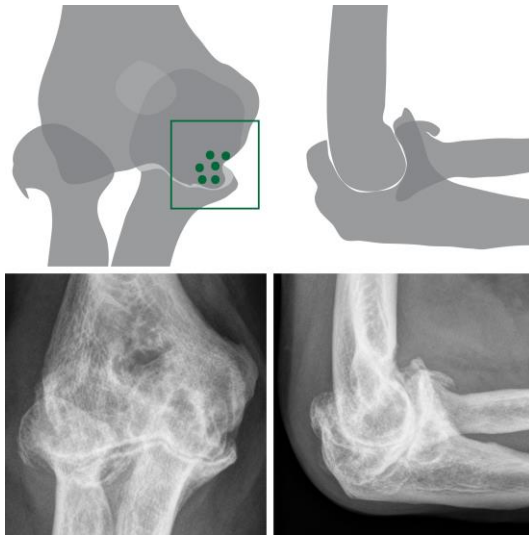

# Elbow

## *Gross incongruence of articulating bone ends*

slight (score 1)

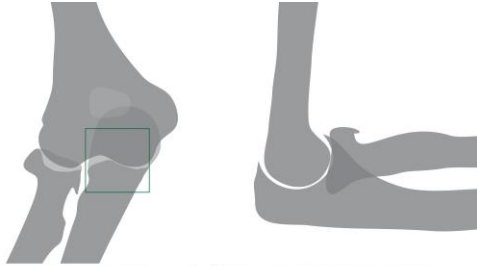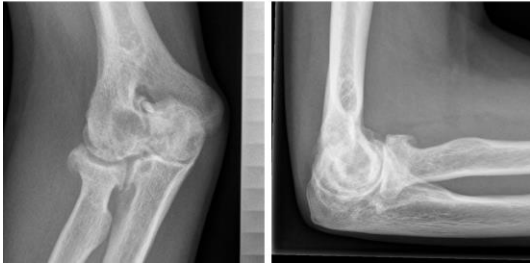

pronounced (score 2)

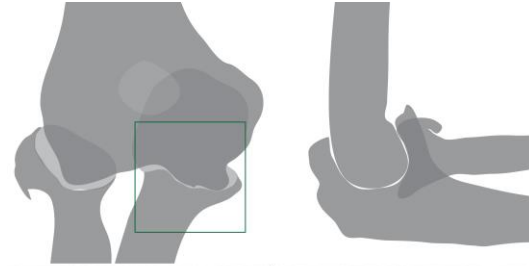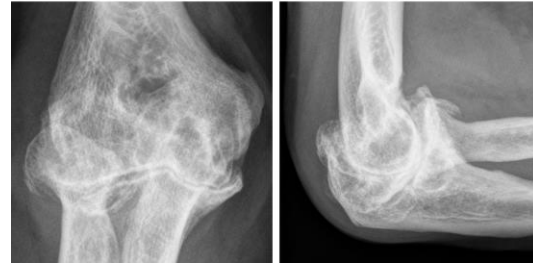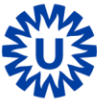

# Elbow

## *Joint deformity (angulation and/or displacement)*

slight (score 1)

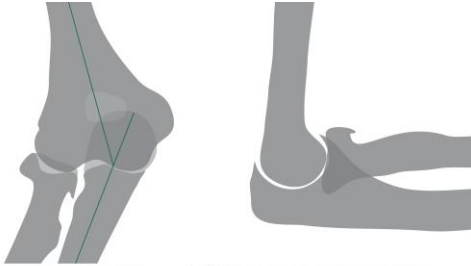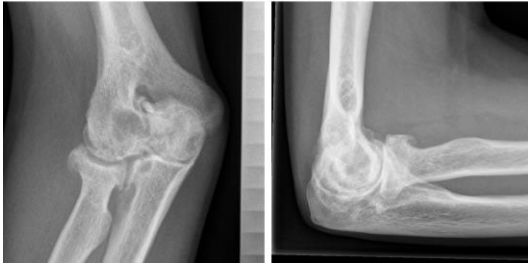

pronounced (score 2)

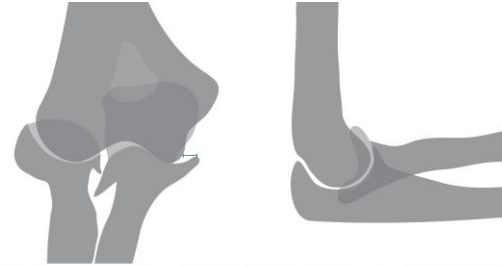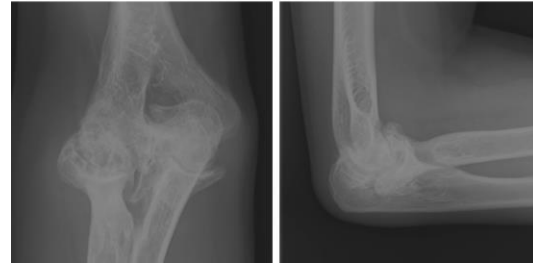

# Knee

*Select example image of interest*

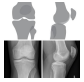

Normal

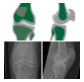

Osteoporosis

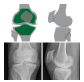

Enlargement of epiphysis

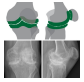

Irregularity of subchondral surface

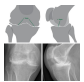

Narrowing of joint space

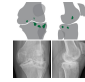

Subchondral cyst formation

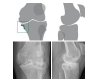

Erosion of joint margins

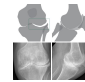

Gross incongruence  
of articulation bone ends

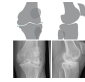

Joint deformity  
(angulation and / or displacement)

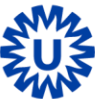

# Knee

## *Normal*

without abnormalities (score 0)

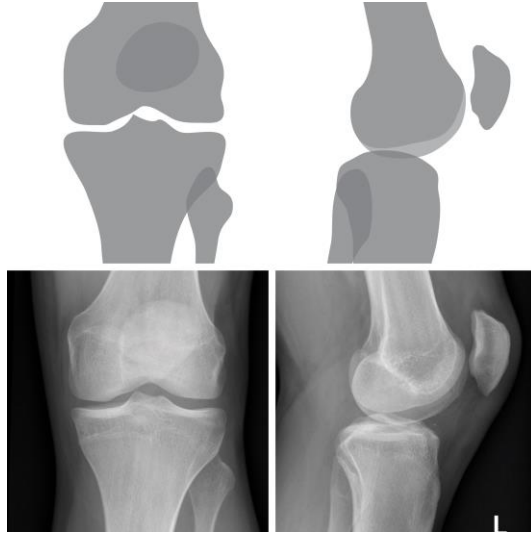

# Knee

## *Osteoporosis*

present (score 1)

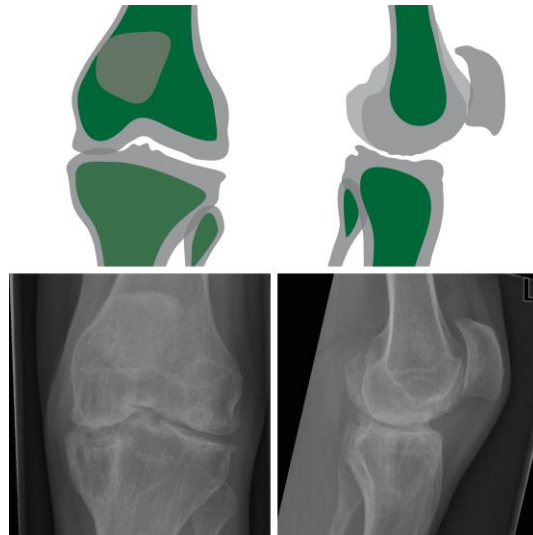

# Knee

## *Enlargement of epiphysis*

present (score 1)

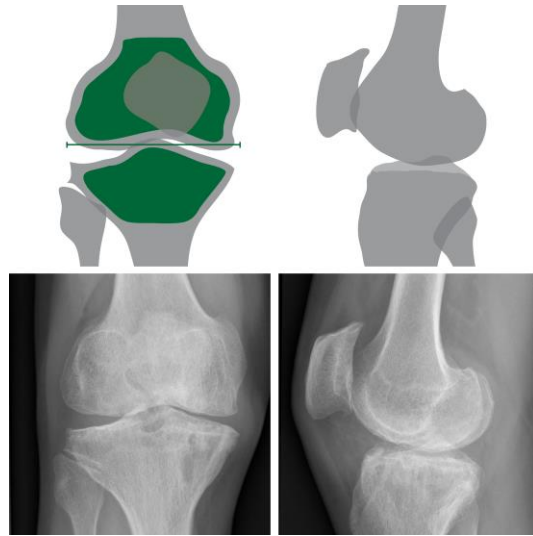



# Knee

## *Irregularity of subchondral surface*

partially involved (score 1)

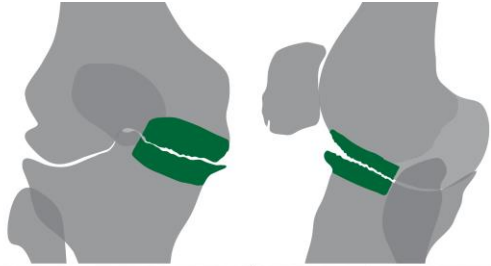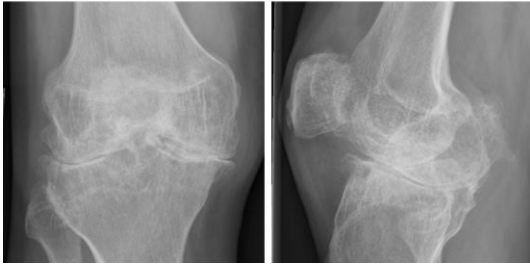

totally involved (score 2)

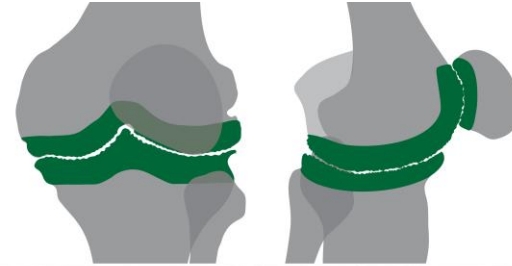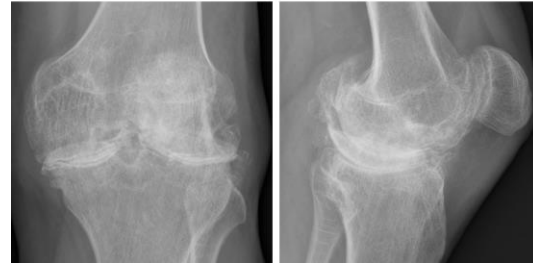

# Knee

## *Narrowing of joint space*

joint space >1mm (score 1)

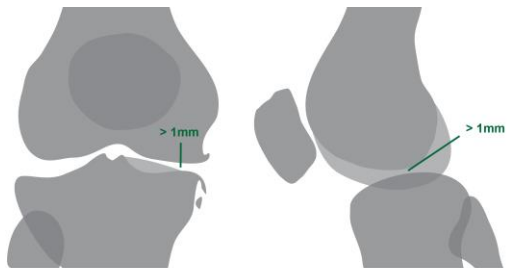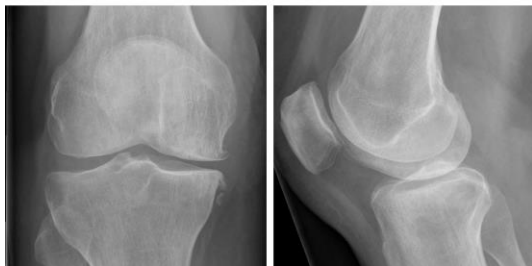

joint space <1mm (score 2)

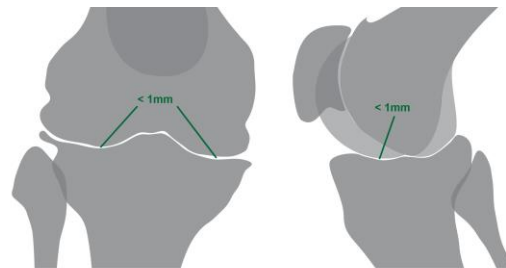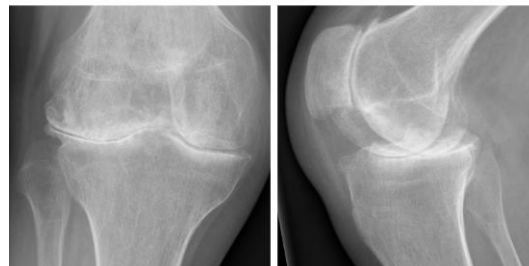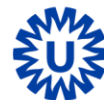

# Knee

## *Subchondral cysts formation*

1 cyst (score 1)

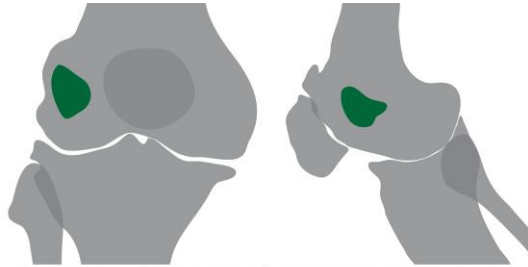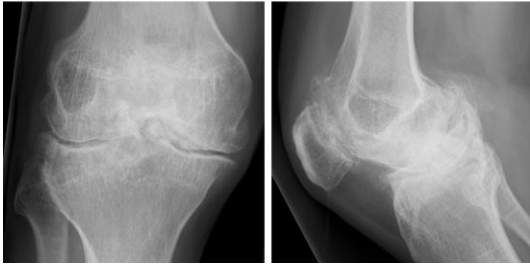

>1 cyst (score 2)

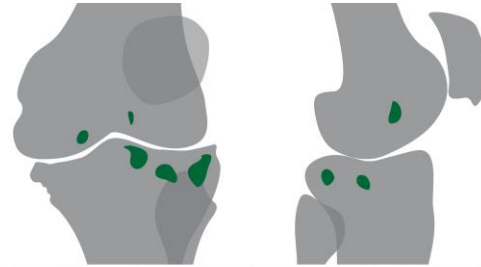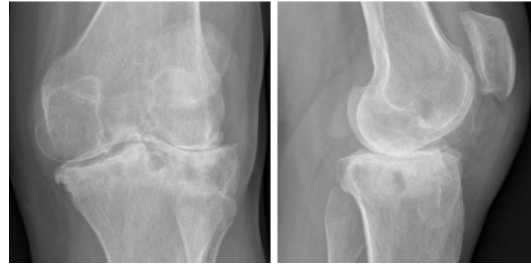

# Knee

## *Erosion of joint margins*

present (score 1)

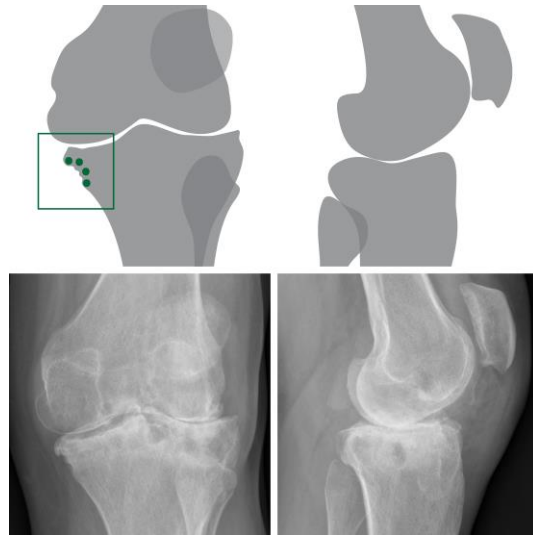

# Knee

## *Gross incongruence of articulating bone ends*

slight (score 1)

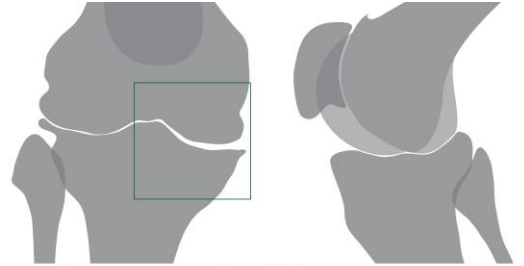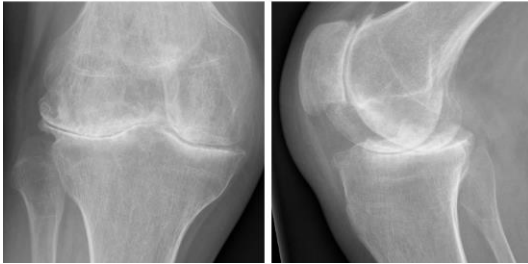

pronounced (score 2)

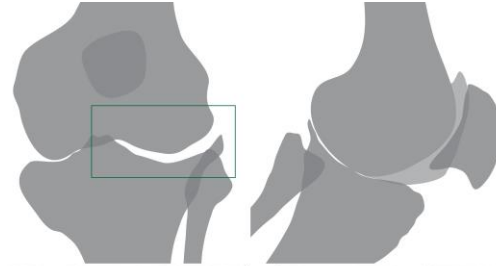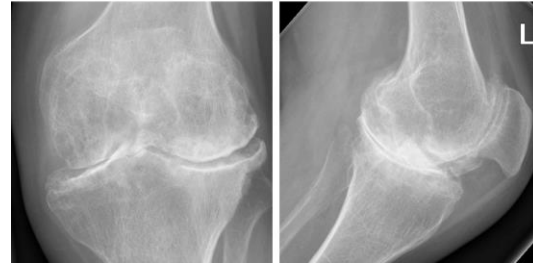

# Knee

## *Joint deformity (angulation and/or displacement)*

slight (score 1)

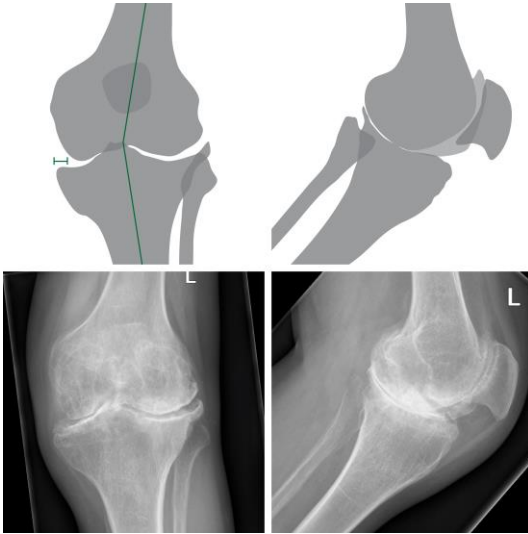

pronounced (score 2)

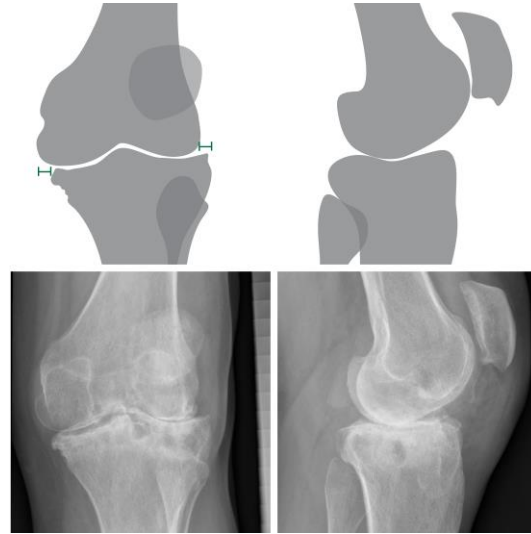

# Ankle

*Select example image of interest*

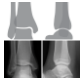

Normal

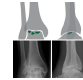

Subchondral cyst formation

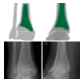

Osteoporosis

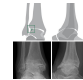

Erosion of joint margins

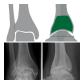

Enlargement of epiphysis

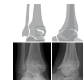

Gross incongruence  
of articulation bone ends

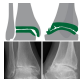

Irregularity of subchondral surface

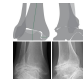

Joint deformity  
(angulation and / or displacement)

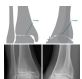

Narrowing of joint space

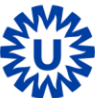

# Ankle

## *Normal*

without abnormalities (score 0)

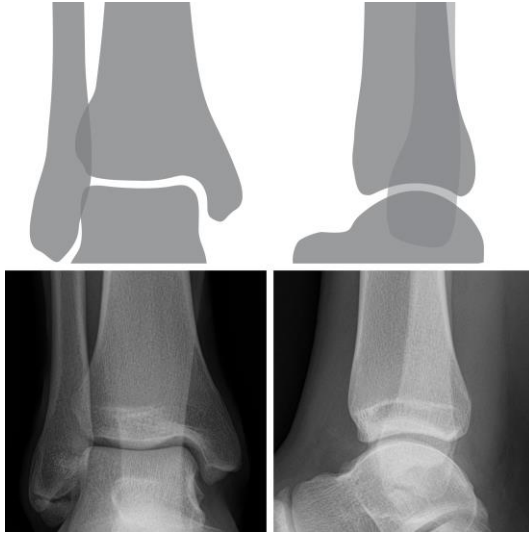



# Ankle

## *Osteoporosis*

present (score 1)

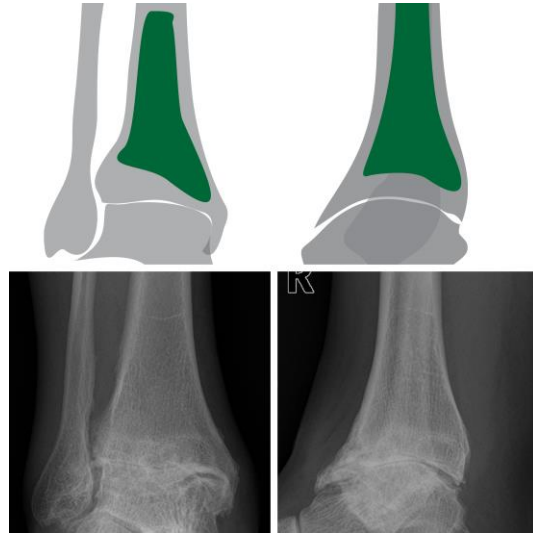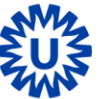

# Ankle

## *Enlargement of epiphysis*

present (score 1)

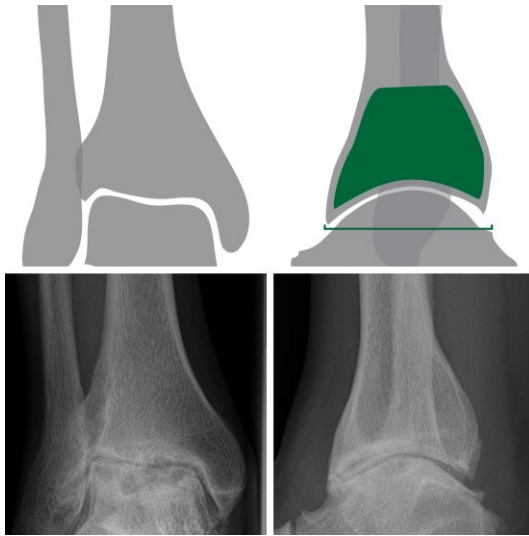

# Ankle

## *Irregularity of subchondral surface*

partially involved (score 1)

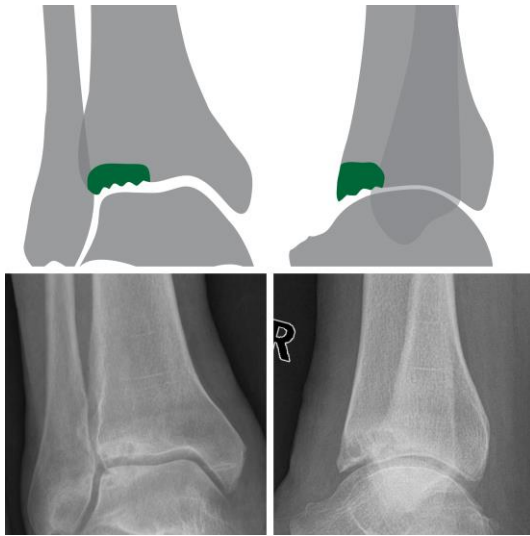

totally involved (score 2)

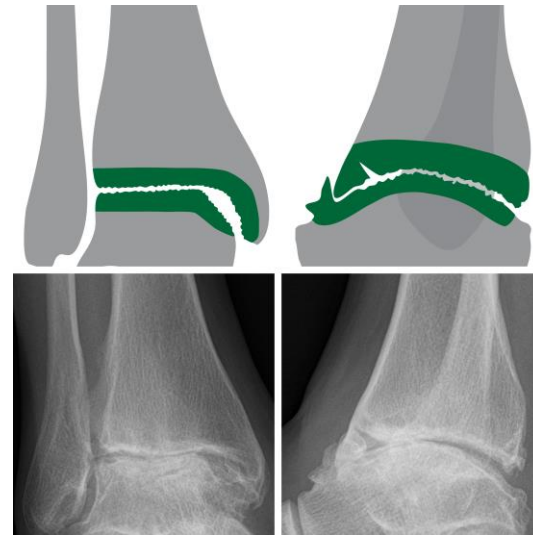

# Ankle

## *Narrowing of joint space*

joint space >1mm (score 1)

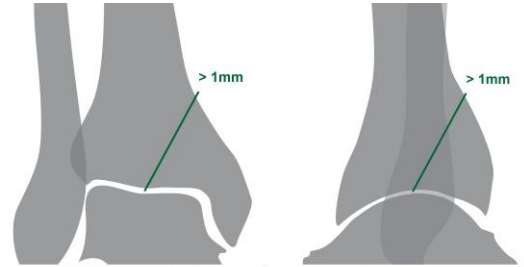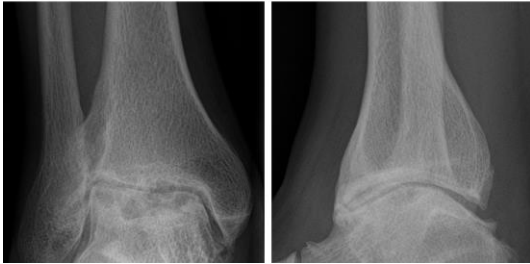

joint space <1mm (score 2)

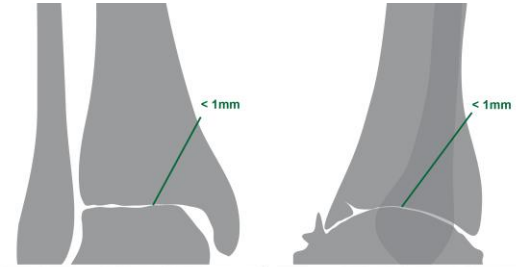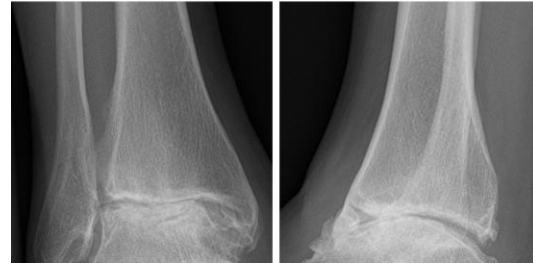

# Ankle

## *Subchondral cysts formation*

1 cyst (score 1)

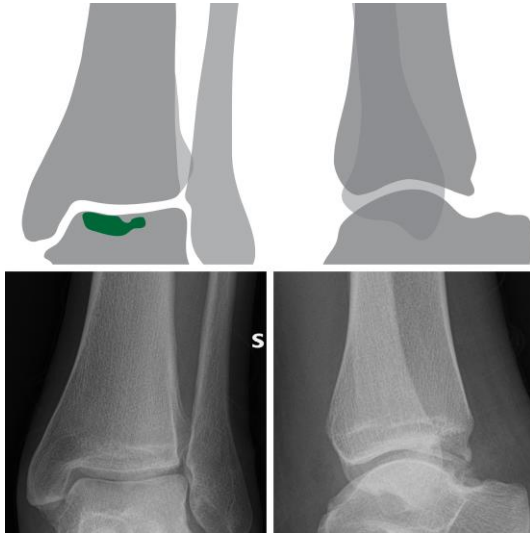

>1 cyst (score 2)

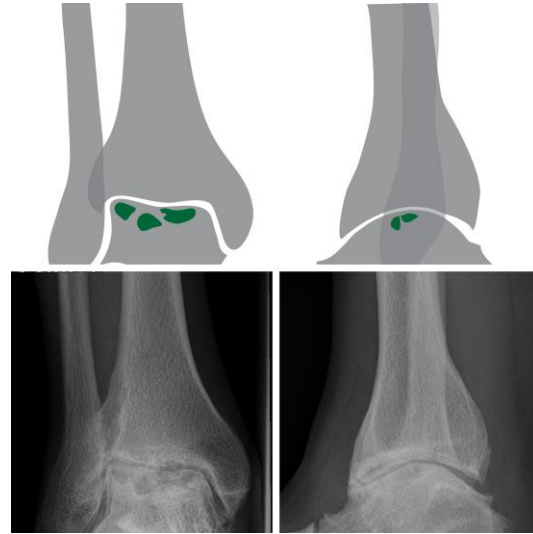

# Ankle

## *Erosion of joint margins*

present (score 1)

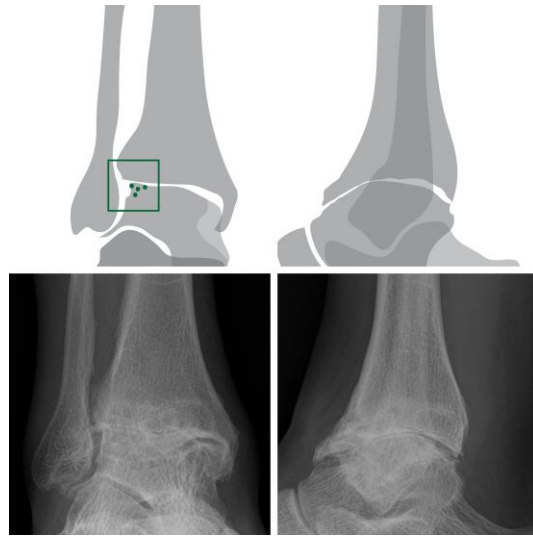

# Ankle

## *Gross incongruence of articulating bone ends*

slight (score 1)

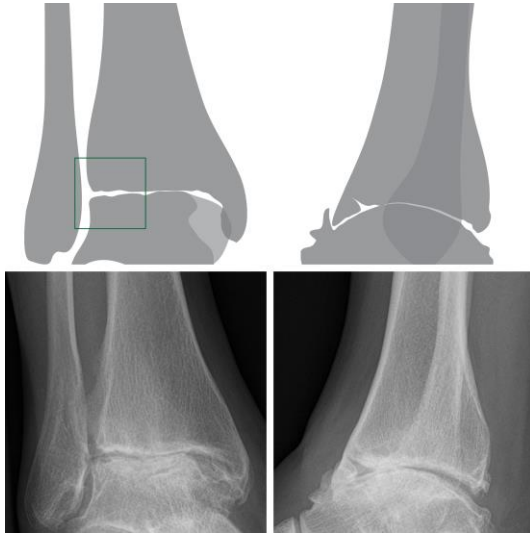

pronounced (score 2)

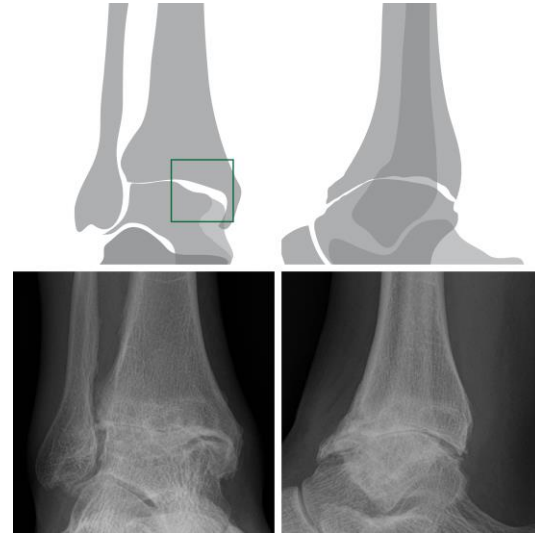

# Ankle

## *Joint deformity (angulation and/or displacement)*

slight (score 1)

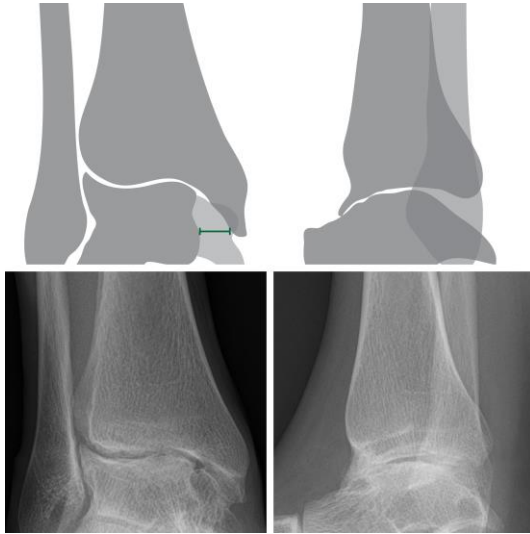

pronounced (score 2)

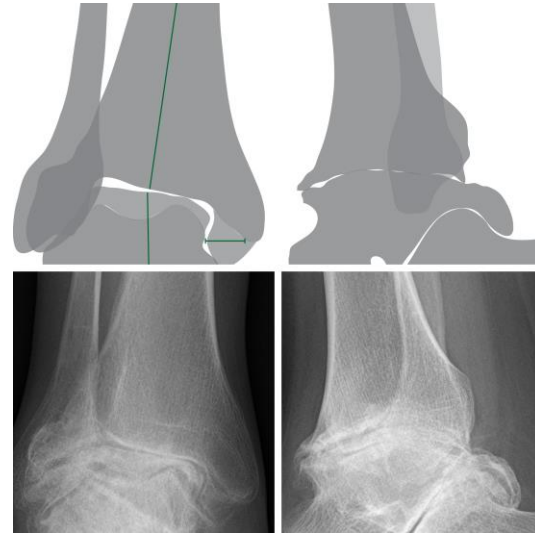

Supplement: 330_2015_4013_MOESM2_ESM.pdf [file 330_2015_4013_MOESM2_ESM.pdf]
